# Supplementary material for: ATM Regulated PTEN Degradation Is XIAP E3 Ubiquitin Ligase Mediated in p85α Deficient Cancer Cells and Influence Platinum Sensitivity
Source: Cells. 2019 Oct 18;8(10):1271. doi: 10.3390/cells8101271 (PMC6848936; doi:10.3390/cells8101271)
Supplement: Supplementary file 1 [file cells-08-01271-s001.pdf]

## Supplementary Figure legends

**Supplementary figure S1:** Relative protein quantification by western blotting of (A) ATM, PTEN and p-AKT1 in LN18 and LN229 cells. (B) ATM, PTEN and p-PTEN in LN18 control and ATM\_KO. (D) PTEN and p-PTEN in LN18 untreated and KU55933 treated cells.

**Supplementary Figure S2:** Relative protein quantification by western blotting of (A) PTEN and p-PTEN in LN18 control and ATM\_KO cells treated LN18 with cycloheximide and MG132 as indicated. (D) p-AKT1 levels in LN18 control and ATM\_KO cells. (E) PTEN levels in LN18 cells treated with pan AKT inhibitor MK2206. (G) PTEN and p-PTEN in LN18 p85\_KI control and LN18 p85\_KI KU55933 treated cells. (H) ATM, PTEN and p-PTEN in LN229 control and ATM\_KO cells. (I) PTEN and p-PTEN in KU55933 treated LN229 cells.

**Supplementary Figure S3:** (A) CK2 $\alpha$  and p-CK2 $\alpha$  in LN18 control and ATM\_KO cells. (B) PTEN and p-PTEN in LN18 CK2\_KD cells. (C) GSK $\beta$  and p-GSK $\beta$  in LN18 control and ATM\_KO cells. (D) CK2 $\alpha$  and p-CK2 $\alpha$  in HeLa control and ATM\_KO cells. (E) PTEN and p-PTEN in CK2\_KD HeLa cells. (F) PTEN and p-PTEN in OVCAR3 CK2\_KD cells. (G) CK2 $\alpha$  and p-CK2 $\alpha$  in LN229 ATMKO cells. (H) CK2 $\alpha$  and p-CK2 $\alpha$  in KU55933 treated LN229 cells. (I) PTEN and p-PTEN in LN18 p85\_KI cells CK2 $\alpha$  knock down (K) PTEN and p-PTEN in CK2\_KD, p85 +CK2\_KD and p85\_KD+ CK2 inhibitor LN229 cells. (L) CK2 $\alpha$  and p-CK2 $\alpha$  in OVCAR4 ATM\_KD cells. (M) CK2 $\alpha$  and p-CK2 $\alpha$  in KU55933 treated OVCAR4 cells. (R) PTEN and p-PTEN in OVCAR4 in p85\_KD, p85\_KD+ CK2\_KD and p85\_KD +CK2 inhibitor treated OVCAR4 cells.

**Supplementary Figure S4:** (A) Levels of ATM, PTEN and p-PTEN and p85 $\alpha$  in HeLa ATM SilenciX cells. As well as levels of PTEN and p-PTEN in HeLa control cells treated with 10 $\mu$ M KU55933. (B) PTEN levels in OVCAR3 and OVCAR4 cell lines. PTEN and p-PTEN levels in ATM depleted OVCAR3 cells. PTEN and p-PTEN levels in OVCAR3 were treated with 10 $\mu$ M of KU55933. (C) PTEN and p-PTEN levels in OVCAR4 cells transfected

with ATM SiRNA. Levels of PTEN and p-PTEN in OVCAR4 treated with 10 $\mu$ M of KU55933.

**Supplementary Figure S5:** (A) CK2 $\alpha$ , p-CK2 $\alpha$  levels in LN18 untreated and KU55933 treated cells. (B) PTEN, p-PTEN levels in LN18 cells treated with CK2 $\alpha$  inhibitor. (C) CK2 $\alpha$  and p-CK2 $\alpha$  levels in Hela control cells treated with KU55933. (D) Levels of PTEN, p-PTEN in Hela cells treated with CK2 $\alpha$  inhibitor. (E) PTEN, p-PTEN and CK2 $\alpha$  levels in OVCAR3 cells treated with CK2 $\alpha$  inhibitor.

**Supplementary Figure S6:** (D) p-XIAP levels in LN18 and LN229 control and ATM\_KO cells. (E) PTEN and p-PTEN in ATM\_KO, ATM\_KO+XIAP KD LN18 cells. (F) PTEN and p-PTEN in ATM\_KD alone and ATM\_KD +XIAP double KD in Hela cells. (G) PTEN and p-PTEN in ATM\_KD alone and ATM\_KD +XIAP double KD OVCAR3 cells. (H) CK2 $\alpha$  in ATM\_KO and ATM\_KO +XIAP\_KD in LN18 cells. (I) CK2 $\alpha$  in ATM\_KD and ATM\_KD +XIAP\_KD in Hela cells. (J) CK2 $\alpha$  in ATM\_KD and ATM\_KD+XIAP\_KD OVCAR3 cells. (K) CK2 $\alpha$  and p-CK2 $\alpha$  in LN229 ATM\_KO+ p85\_KD and ATM\_KO+p85 and XIAP double KD LN229 cells.

**Supplementary Figure S7:** (A) PTEN and p-PTEN in LN18 control cells treated with KU55933 and treated accordingly with cycloheximide and MG132 for the different time points. (B) PTEN and p-PTEN in LN18 p85 KI cells treated with KU55933. (C) Doxycycline inducible PTEN in LN229 cells.

**Supplementary Figure S8:** (A) ATM, PTEN and p-PTEN in Hela control and ATM\_KD cells. PTEN and p-PTEN in Hela control untreated and KU55933 treated cells. (B) PTEN in OVCAR3 and OVCAR4. (C) PTEN and p-PTEN in OVCAR3 control and OVCAR3 ATM\_KD. PTEN and p-PTEN in OVCAR3 untreated and KU55933 treated cells. (D) ATM, PTEN and p-PTEN in OVCAR4 ATM\_KD cells. PTEN and p-PTEN in KU55933 treated OVCAR4 cells. (E) CK2 $\alpha$  and p-CK2 $\alpha$  in KU55933 treated LN18. (F) PTEN and p-PTEN in CK2 inhibitor treated LN18 cells. (G) CK2 $\alpha$  and p-CK2 $\alpha$  in

Hela control cells treated with KU55933. PTEN and p-PTEN in CK2 inhibitor treated Hela cells. **(H)** PTEN and p-PTEN in CK2 inhibitor treated OVCAR3 cells.

**Supplementary Figure S9:** **(A)** Cisplatin sensitivity in LN18 ATM\_KO and LN18 ATM\_KO\_p85 KI. **(B)** PTEN and p-PTEN in p85\_KD, ATM\_KD, p85+ATM\_KD and p85+KU55933 in OVCAR4 cells. **(C)** PTEN and p-PTEN in OVCAR4 in p85\_KD, p85\_KD+CK2\_KD and p85\_KD +CK2 inhibitor treated OVCAR4 cells. **(D)** Kaplan-Meier curve for PFS ovarian cancers of: XIAP/ PTEN co-expression in the whole cohort. XIAP /PTEN co-expression in ATM positive tumours only. PTEN/p85 co-expression in ATM positive tumours only.

**Supplementary Figure S10:** **(A)** Potential phosphorylation sites for ATM on XIAP. **(B)** Amino acids translation of human CK2 $\alpha$  sequence.
